# Supplementary material for: Clinical Course and Gross Pathological Findings in Wild Boar Infected with a Highly Virulent Strain of African Swine Fever Virus Genotype II
Source: Pathogens. 2020 Aug 22;9(9):688. doi: 10.3390/pathogens9090688 (PMC7559345; doi:10.3390/pathogens9090688)
Supplement: Supplementary file 1 [file pathogens-09-00688-s001.pdf]

# Supplementary Material

**Table S1.** Summary of individual clinical parameters of the in-contact and intramuscularly infected animals.

| <i>ID<br/>Animal</i> | <i>Route of<br/>exposure</i> | <i>Onset of<br/>clinical signs<br/>(DPI)</i> | <i>Clinical<br/>score &gt; 8<br/>(DPI)</i> | <i>Last clinical<br/>evaluation<br/>recorded (CS)</i> | <i>Survival time<br/>(DPI)</i> | <i>Last blood<br/>sample<br/>analysis (CT)</i> | <i>Clinical signs</i>                                                                                                                                            |
|----------------------|------------------------------|----------------------------------------------|--------------------------------------------|-------------------------------------------------------|--------------------------------|------------------------------------------------|------------------------------------------------------------------------------------------------------------------------------------------------------------------|
| 1                    | In-contact                   | 10                                           | 12                                         | 15                                                    | 14                             | 20                                             | Fever, reduced liveliness, generalized erythema, moderate dyspnea, thick ocular discharge                                                                        |
| 2                    |                              | 10                                           | -                                          | 7                                                     | 13                             | 24                                             | Fever, generalized erythema, thick ocular discharge, transparent mucus in faeces                                                                                 |
| 3                    |                              | 10                                           | 13                                         | 15                                                    | 15                             | 17                                             | Fever, get up only to eat and drink, generalized erythema, slight walking difficulties only when getting up, significantly dyspnea                               |
| 4                    |                              | 11                                           | 12                                         | 15                                                    | 13                             | 17                                             | Fever, generalized erythema, moderate dyspnea, thick ocular discharge, vomiting < 24h                                                                            |
| 5                    |                              | 10                                           | 12                                         | 11                                                    | 13                             | 17                                             | Reduced liveliness, generalized erythema, thick ocular discharge for more than two sequential days                                                               |
| 6                    |                              | 10                                           | 11                                         | 16                                                    | 12                             | 16                                             | Fever, get up only to eat and drink, generalized erythema, walking difficulties, joint swelling < 24h                                                            |
| 7                    |                              | 9                                            | 12                                         | 17                                                    | 15                             | 18                                             | Fever, get up only to eat and drink, generalized erythema, slight walking difficulties only when getting up, thick ocular discharge, transparent mucus in faeces |

|    |               |    |    |    |    |    |                                                                                                                                                              |
|----|---------------|----|----|----|----|----|--------------------------------------------------------------------------------------------------------------------------------------------------------------|
| 8  |               | 10 | 13 | 18 | 15 | 19 | Fever, get up only touched, generalized erythema, walking difficulties, joint swelling, moderate dyspnea, slight ocular discharge, vomiting < 24h            |
| 9  |               | 9  | 10 | 17 | 12 | 17 | Fever, get up only touched, generalized erythema, walking difficulties,                                                                                      |
| 10 |               | 10 | -  | 5  | 12 | 16 | Reduced liveliness, localized slight erythema, slight walking difficulties                                                                                   |
| 11 |               | 10 | 13 | 8  | 15 | 19 | Reduced liveliness, localized erythema, slight dyspnea, slight ocular discharge                                                                              |
| 12 | IM inoculated | 4  | 7  | 17 | 10 | 15 | Fever, get up only touched, generalized erythema, walking difficulties, joint swelling, moderate dyspnea, thick ocular discharge, transparent mucus in feces |
| 13 |               | 3  | 6  | 8  | 7  | 22 | Fever, get up only touched, generalized erythema, slight ocular discharge                                                                                    |
| 14 |               | 6  | -  | 5  | 12 | 33 | Fever, localized erythema, anorexia                                                                                                                          |
| 15 |               | 6  | -  | 4  | 14 | 32 | Fever, reduced liveliness                                                                                                                                    |
| 16 |               | 3  | -  | 6  | 7  | 22 | Fever, localized erythema, reduced liveliness                                                                                                                |
| 17 |               | 3  | -  | 7  | 10 | 17 | Fever, localized erythema, reduced liveliness, slight dyspnea                                                                                                |

\*CT = Cycle thresholds

\*CS = Clinical score

\*DPI = Days post-inoculation

**Table S2.** Individual clinical score through the days post-infection of intramuscularly infected animals. Including the time of onset of the following clinical signs: fever (F), lethargy (L), anorexia (A), skin alterations (S), ocular/nasal discharges (O), joint swelling (J), respiratory symptoms (R), digestive symptoms (D), neurological symptoms (N). Once a clinical sign was observed, it was maintained until the end of the experiment.

| <i>ID</i> | Days post-infection |   |   |     |     |   |         |       |     |       |      |    |    |    |    |    |
|-----------|---------------------|---|---|-----|-----|---|---------|-------|-----|-------|------|----|----|----|----|----|
|           | 0                   | 1 | 2 | 3   | 4   | 5 | 6       | 7     | 8   | 9     | 10   | 11 | 12 | 13 | 14 | 15 |
| <b>12</b> | 0                   | 0 | 0 | 0*  | 1   | 1 | 2       | 9*    | 10  | 17*   | 17*/ |    |    |    |    |    |
|           |                     |   |   |     | L   |   | A       | S,O,R |     | J,D   |      |    |    |    |    |    |
| <b>13</b> | 0                   | 0 | 0 | 2*  | 4*  | 3 | 8       | 8+    |     |       |      |    |    |    |    |    |
|           |                     |   |   | F,S | L,A |   |         |       |     |       |      |    |    |    |    |    |
| <b>14</b> | 0                   | 0 | 0 | 0*  | 0   | 0 | 3*      | 1*    | 2   | 2     | 5*   | 6* | 5+ |    |    |    |
|           |                     |   |   |     |     |   | F       |       | L,A |       |      | S  |    |    |    |    |
| <b>15</b> | 0                   | 0 | 0 | 0*  | 0   | 0 | 1*      | 0*    | 0   | 0     | 2*   | 1  | 2  | 4* | 4+ |    |
|           |                     |   |   |     |     |   | F       |       |     |       |      | L  | A  | S  |    |    |
| <b>16</b> | 0                   | 0 | 0 | 1*  | 1   | 1 | 6*      | 6+    |     |       |      |    |    |    |    |    |
|           |                     |   |   | L   |     |   | F,A,R,O |       |     |       |      |    |    |    |    |    |
| <b>17</b> | 0                   | 0 | 0 | 1*  | 1   | 1 | 3*      | 4*    | 2   | 7*    | 7+   |    |    |    |    |    |
|           |                     |   |   | L   |     |   | F,L     | A     |     | R,O,D |      |    |    |    |    |    |

+ Found death      / Euthanized      \*Clinical score including rectal temperature

**Table S3.** Individual clinical score through the days post-infection of contact infected animals. Including the time of onset of the following clinical signs: fever (F), lethargy (L), anorexia (A), skin alterations (S), ocular/nasal discharges (O), joint swelling (J), respiratory symptoms (R), digestive symptoms (D), neurological symptoms (N). Once a clinical sign was observed, it was maintained until the end of the experiment.

| ID | Days post-infection |   |   |    |   |   |   |    |   |   |                   |         |         |      |      |      |
|----|---------------------|---|---|----|---|---|---|----|---|---|-------------------|---------|---------|------|------|------|
|    | 0                   | 1 | 2 | 3  | 4 | 5 | 6 | 7  | 8 | 9 | 10                | 11      | 12      | 13   | 14   | 15   |
| 1  | 0                   | 0 | 0 | 0* | 0 | 0 | 0 | 0* | 0 | 0 | 5*                | 3       | 11      | 15*  | 15*/ |      |
|    |                     |   |   |    |   |   |   |    |   |   | F,L,S             |         | A,J,O,R |      |      |      |
| 2  | 0                   | 0 | 0 | 0* | 0 | 0 | 0 | 0* | 0 | 0 | 3*                | 4       | 7       | 7+   |      |      |
|    |                     |   |   |    |   |   |   |    |   |   | F,L               |         | S,O     |      |      |      |
| 3  | 0                   | 0 | 0 | 0* | 0 | 0 | 0 | 0* | 0 | 0 | 1*                | 3       | 7       | 10*  | 12*  | 15*/ |
|    |                     |   |   |    |   |   |   |    |   |   | F                 |         | L,A,S,O |      |      | J,R  |
| 4  | 0                   | 0 | 0 | 0* | 0 | 0 | 0 | 0* | 0 | 0 | 0*                | 7       | 10      | 15*/ |      |      |
|    |                     |   |   |    |   |   |   |    |   |   |                   | L,A,S   | O,R     | D    |      |      |
| 5  | 0                   | 0 | 0 | 0* | 0 | 0 | 0 | 0* | 0 | 0 | 4*                | 7       | 11      | 11*/ |      |      |
|    |                     |   |   |    |   |   |   |    |   |   | F,L               | A,S     | O,R     |      |      |      |
| 6  | 0                   | 0 | 0 | 0* | 0 | 0 | 0 | 0* | 0 | 0 | 2*                | 8       | 16*/    |      |      |      |
|    |                     |   |   |    |   |   |   |    |   |   | F,L               | A,S,J,O | D       |      |      |      |
| 7  | 0                   | 0 | 0 | 0* | 0 | 0 | 0 | 0* | 0 | 1 | 7*                | 6       | 8       | 15*  | 17*  | 17*/ |
|    |                     |   |   |    |   |   |   |    |   |   | F,L,A,S           |         | J,O     | R,D  |      |      |
| 8  | 0                   | 0 | 0 | 0* | 0 | 0 | 0 | 0* | 0 | 0 | 1*                | 6       | 7       | 12   | 17*  | 18*/ |
|    |                     |   |   |    |   |   |   |    |   |   | F                 | L,A,O   | S       | R,D  | J    |      |
| 9  | 0                   | 0 | 0 | 0* | 0 | 0 | 0 | 0* | 0 | 2 | 12*               | 10      | 17*/    |      |      |      |
|    |                     |   |   |    |   |   |   |    |   |   | F,L,A,S,<br>O,R,D |         | J       |      |      |      |
| 10 | 0                   | 0 | 0 | 0* | 0 | 0 | 0 | 0* | 0 | 0 | 5*                | 4       | 5+      |      |      |      |
|    |                     |   |   |    |   |   |   |    |   |   | F,L,J,O           |         |         |      |      |      |
| 11 | 0                   | 0 | 0 | 0* | 0 | 0 | 0 | 0* | 0 | 0 | 1*                | 2       | 4       | 8*   | 8*   | 8*/  |
|    |                     |   |   |    |   |   |   |    |   |   | F                 |         | L,A,S   | O,R  |      |      |

+ Found death

/ Euthanized

\*Clinical score including rectal temperature
